# Supplementary material for: Template preparation of high-surface-area barium hexaaluminate as nickel catalyst support for improved CO methanation
Source: Royal Society of Chemistry journal article supplement (doi:10.1039/c3ra41660g), 2013-01-01
Supplement: c3ra41660g.pdf [file c3ra41660g.pdf]

## Supporting Information

### Template preparation of high-surface-area barium hexaaluminate as Nickel catalyst support for improved CO methanation

Jiajian Gao,<sup>1,2</sup> Chunmiao Jia,<sup>1</sup> Meiju Zhang,<sup>1</sup> Fangna Gu,<sup>1,\*</sup>

Guangwen Xu,<sup>1</sup> Ziyi Zhong,<sup>3</sup> Fabing Su<sup>1,\*</sup>

<sup>1</sup> *State Key Laboratory of Multiphase Complex Systems, Institute of Process Engineering, Chinese Academy of Sciences, Beijing, China 100190*

<sup>2</sup> *University of Chinese Academy of Sciences, Beijing, China 100049*

<sup>3</sup> *Institute of Chemical Engineering and Sciences, A\*star, 1 Pesek Road, Jurong Island, Singapore 627833*

\*Corresponding author: fngu@mail.ipe.ac.cn (F.Gu), fbsu@mail.ipe.ac.cn (F.Su)

Tel: 86-10-82544850; Fax: 86-10-82544851

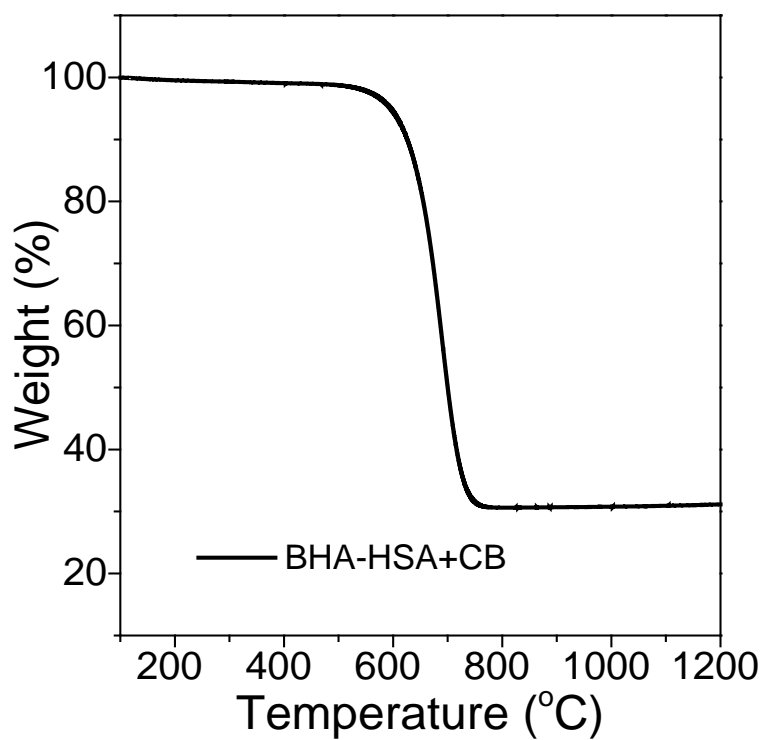

**Fig. S1.** TG curve of BHA-HSA+CB in air.

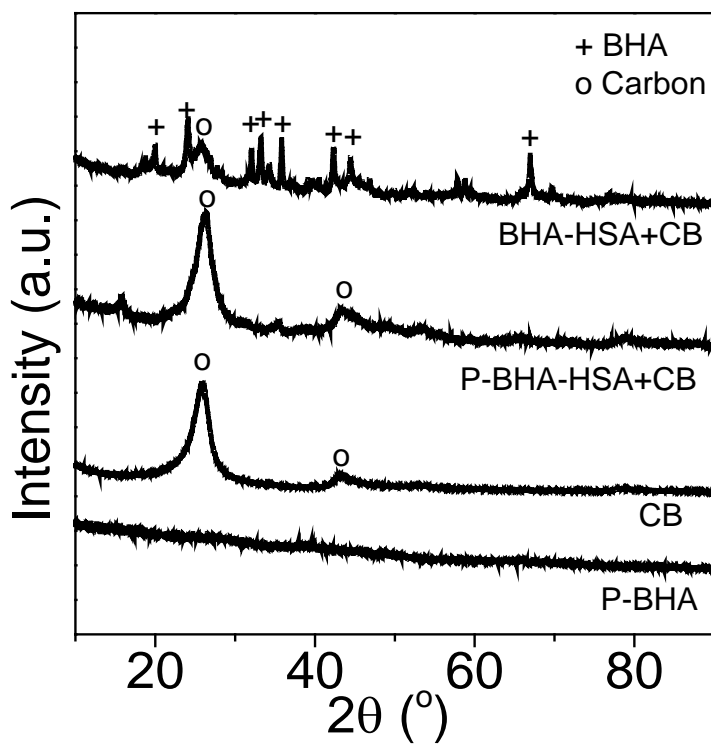

**Fig. S2.** XRD patterns of P-BHA, CB, P-BHA-HSA+CB, and BHA-HSA+CB.
